# Genomic Characterization and High Prevalence of Bocaviruses in Swine

Tongling Shan<sup>1,2,3\*</sup>, Daoliang Lan<sup>1\*</sup>, Linlin Li<sup>2,3</sup>, Chunmei Wang<sup>4</sup>, Li Cui<sup>1</sup>, Wen Zhang<sup>5</sup>, Xiuguo Hua<sup>1\*</sup>, Caixia Zhu<sup>1</sup>, Wei Zhao<sup>1</sup>, Eric Delwart<sup>2,3</sup>

**1** Zoonosis and Comparative Medicine Group, Shanghai Jiao Tong University, Shanghai, People's Republic of China, **2** Blood Systems Research Institute, San Francisco, California, United States of America, **3** Department of Laboratory Medicine, University of California San Francisco, San Francisco, California, United States of America, **4** College of Veterinary Medicine, Huazhong Agricultural University, Wuhan, Hubei, People's Republic of China, **5** School of Medical Science and Laboratory Medicine, Jiangsu University, Zhenjiang, Jiangsu, People's Republic of China

## Abstract

Using random PCR amplification followed by plasmid subcloning and DNA sequencing, we detected bocavirus related sequences in 9 out of 17 porcine stool samples. Using primer walking, we sequenced the nearly complete genomes of two highly divergent bocaviruses we provisionally named porcine bocavirus 1 isolate H18 (PBoV1-H18) and porcine bocavirus 2 isolate A6 (PBoV2-A6) which differed by 51.8% in their NS1 protein. Phylogenetic analysis indicated that PBoV1-H18 was very closely related to a ~2 Kb central region of a porcine bocavirus-like virus (PBo-LikeV) from Sweden described in 2009. PBoV2-A6 was very closely related to the porcine bocavirus genomes PBoV-1 and PBoV2 from China described in 2010. Among 340 fecal samples collected from different age, asymptomatic swine in five Chinese provinces, the prevalence of PBoV1-H18 and PBoV2-A6 related viruses were 45–75% and 55–70% respectively, with 30–47% of pigs co-infected. PBoV1-H18 and PBoV2-A6 related strains were highly conserved, while PBoV2-H18 related strains were more diverse, grouping into two genotypes corresponding to the previously described PBoV1 and PBoV2. Together with the recently described partial bocavirus genomes labeled V6 and V7, a total of three major porcine bocavirus clades have therefore been described to date. Further studies will be required to elucidate the possible pathogenic impact of these diverse bocaviruses either alone or in combination with other porcine viruses.

**Citation:** Shan T, Lan D, Li L, Wang C, Cui L, et al. (2011) Genomic Characterization and High Prevalence of Bocaviruses in Swine. PLoS ONE 6(4): e17292. doi:10.1371/journal.pone.0017292

**Editor:** Daniel G. Bausch, Tulane School of Public Health and Tropical Medicine, United States of America

**Received:** August 24, 2010; **Accepted:** January 27, 2011; **Published:** April 15, 2011

**Copyright:** © 2011 Shan et al. This is an open-access article distributed under the terms of the Creative Commons Attribution License, which permits unrestricted use, distribution, and reproduction in any medium, provided the original author and source are credited.

**Funding:** This work was supported by Key Project of Shanghai Science and Technology Committee of China under Grant No. 063919121. The funders had no role in study design, data collection and analysis, decision to publish, or preparation of the manuscript.

**Competing Interests:** The authors have declared that no competing interests exist.

\* E-mail: hxg@sjtu.edu.cn

† These authors contributed equally to this work.

## Introduction

Members of the *Parvoviridae* family are small non-lipid enveloped viruses with a diameter of 18–26 nm, icosahedral symmetry (T=1), encoded by a single-stranded linear DNA genome of approximately 4,000 to 6,000 nucleotides (nt) [1]. The family includes two subfamilies: *Densovirinae*, *Parvovirinae*. The subfamily of *Densovirinae* contains four genera: *Densovirus*, *Iteravirus*, *Brevidensovirus* and *Pefudensovirus*, which infect only invertebrates [1]. The *Parvovirinae* subfamily is currently subdivided into five genera: *Parvovirus*, *Erythrovirus*, *Dependovirus* (adeno-associated virus), *Amdovirus*, and *Bocavirus*, infecting vertebrates [1].

The bocavirus genus was recently assigned by the International Committee on Taxonomy of Viruses (ICTV) [1] to parvovirus genomes containing a third ORF (labeled NP1) between the NS1 and VP1/VP2 genes [2]. Bocaviruses were first identified in bovine and canine [3,4], samples from which it derives its genus name [1,5]. Presently, the bocavirus genus contains eight members: bovine parvovirus, canine minute virus (CnMV), human bocavirus 1–4 (HBoV1–4), a gorilla bocavirus and a partially sequenced chimpanzee bocavirus [1,6,7].

The first human bocavirus (HBoV) was found in the nasopharyngeal secretion of a child with respiratory problems

using a methodology closely related to that used here [8]. HBoV has been associated with lower respiratory tract symptoms and possibly diarrhea [5,9–22], and shows a very low degree of genetic variability worldwide [6,23,24]. HBoV2 was first reported in the stool of Pakistani children with non-polio acute flaccid paralysis (AFP) [10], and then in Australian children and Chinese children with diarrhea [9,25]. HBoV3 was first reported in the stool of Australian children with diarrhea [9] and then in stool from Nigerian, Tunisian, Nepalese and US children [5]. HBoV4 was reported in the stool of children with AFP from Nigeria and Tunisia [5]. HBoV 1/2/3 were also detected in untreated sewage water from throughout the US [26]. Recently, a novel bocavirus was identified in the feces of captive gorillas with diarrhea [6] and from wild gorillas and chimpanzees [7]. In 2009, a porcine bocavirus-like virus (PBo-likeV) was reported in swine feces with postweaning multisystemic wasting syndrome in Sweden and 1854 bp of its partial genome sequenced [27]. In 2010, the nearly complete genomes of distinct porcine bocaviruses provisionally named PBoV1 and PBoV2 were characterized from feces of swine in China [28]. Finally, partial genome sequences of 2.4 Kb from another clade of porcine bocaviruses labeled 6V and 7V where also identified yielding three major bocavirus groups in swine (PBo-likeV, PBoV1/PBoV2, and 6V/7V).

Random amplification and sequencing has been used to discover novel virus in human and animal [8,10,29–53]. In this study, we found in swine feces highly distinct bocavirus whose genome we tentatively named porcine bocavirus 1 (PBoV1-H18), and porcine bocavirus 2 (PBoV 2-A6). The nearly complete genomes of both viruses were acquired and are described here. PBoV1-H18 and PBoV2-A6 were also screened for in 340 stool samples of asymptomatic swine from five provinces of China.

## Materials and Methods

### Sample collection

A total of 340 porcine stool samples from different aged swine were collected from 17 middle or large-scale porcine farms (200–2,000 sows each) in five provinces of China from April 2008 to October 2009, of which 80 were collected from four farms located in Shanghai, 60 from three farms located in Jiangsu province, 120 from six farms located in Anhui province, 20 from a farm located in Shandong province, and 60 from three farms located in Guizhou province and stored at  $-80^{\circ}\text{C}$  (Table 1).

### Viral particle purification and RT-PCR

One stool sample was randomly selected from each of the 17 farms. The samples were suspended in PBS (0.01 M phosphate, pH7.2–7.4, 0.15NaCl), vortexed, centrifuged at 15000 g, and filtered through a 0.22- $\mu\text{m}$  filter to remove eukaryotic- and bacterial-cell-sized particles [45,46,54,55]. The filtrates were then treated with benzonase, DNase and RNase to digest non-particle-protected nucleic acid as reported [54,55]. Viral nucleic acids were then extracted using the TIANamp virus DNA/RNA Kit (TIANGEN BIOTECH, BEIJING, CO., Ltd.). Viral cDNA synthesis was performed by incubation of the extracted viral RNA/DNA with 100 pmol of primer K-8N [56] with a degenerate 3' end and the use of Superscript reverse transcriptase, and the opposite strand of the cDNA was generated after melting and reannealing and primer extension using Klenow DNA

polymerase [45,46,54–56]. PCR of extension products was performed as reported previously using the K-8 primer (K-8N without the degenerate 3' end) [54]. This protocol amplifies both viral RNA and DNA genomes [54,55].

### Novel virus identification and complete genome sequencing

Random RT-PCR DNA products ran as smears on agarose gel and were gel purified (Axygen, CA, USA), then subcloned into pMD-18T plasmid vector (TaKaRa, Japan) for sequencing. The sequences were then screened for sequence similarities using tBLASTx and BLASTn against the nr database in GenBank.

### Molecular epidemiology

DNA and RNA were also directly extracted from centrifuged stool supernatant using the TIANamp virus DNA/RNA Kit (TIANGEN BIOTECH, BEIJING, CO., Ltd.). For PBoV1-H18 related sequences screening, primers PBoV1-L1 (5'-CTGTGGCACTTCAGATTTAC-3') and PBoV1-R1 (5'-TCTGTTT-TGTGTATTTGTGG-3') were used for the first round of nested PCR, and the primers PBoV1-L2 (5'-ACAGGAATTAACAGACGAAG-3') and PBoV1-R2 (5'-TATCGGCACGTACCATTGAC-3') were used for the second round of nested PCR, resulting in the amplification of a 530-bp fragment over the NP1 and VP1 genes. PBoV2-A6 related sequences were detected using primers PBoV2-L1 (5'-CAAGGGCGCTACACACACAA-3') and PBoV2-R1 (5'-TTAATTCGCACTTAGTTGG-3') for the first round of nested PCR; primers PBoV2-L2 (5'-TCCAGTAACCAAAACA-TACC-3') and PBoV2-R2 (5'-TCTCGTGTGATTGTAG-CTC-3') for the second round of nested PCR, amplifying a 439-bp fragment of the VP1 gene.

### Sequence and phylogenetic analysis

Sequences of each PCR product were assembled using SeqMan II program (DNASTAR, Inc). The identification of open reading

**Table 1.** High prevalence of PBoV1-H18 and PBoV2-A6 detected by nested-PCR assay in fecal samples from different aged pigs in five provinces of China.

| Location (province) | Number of farms | Age (day) | Positive/tested samples for PBoV1-H18 | Positive/tested samples for HBoV2-A6 | Co-infection/tested samples |
|---------------------|-----------------|-----------|---------------------------------------|--------------------------------------|-----------------------------|
| Shanghai            | 4               | <45       | 22/40                                 | 24/40                                |                             |
|                     |                 | 45–90     | 27/40                                 | 23/40                                |                             |
|                     |                 |           | 49/80 (61.3%)                         | 47/80 (58.8%)                        | 31/80 (38.8%)               |
| Jiangsu             | 3               | <45       | 10/30                                 | 24/30                                |                             |
|                     |                 | 45–90     | 18/30                                 | 21/30                                |                             |
|                     |                 |           | 35/60 (58.3%)                         | 41/60 (68.3%)                        | 22/60 (36.7%)               |
| Anhui               | 6               | <45       | 41/60                                 | 42/60                                |                             |
|                     |                 | 45–90     | 36/60                                 | 39/60                                |                             |
|                     |                 |           | 77/120 (64.2%)                        | 81/120 (70.1%)                       | 46/120 (38.3%)              |
| Shandong            | 1               | <45       | 5/10                                  | 5/10                                 |                             |
|                     |                 |           | 4/10                                  | 6/10                                 |                             |
|                     |                 |           | 9/20 (45%)                            | 11/20 (55%)                          | 6/20 (30%)                  |
| Guizhou             | 3               | <45       | 26/30                                 | 21/30                                |                             |
|                     |                 | 45–90     | 19/30                                 | 18/30                                |                             |
|                     |                 |           | 45/60 (75%)                           | 39/60 (65%)                          | 28/60 (46.7%)               |
| Total               | 17              |           | 215/340 (63.2%)                       | 219/340 (64.4%)                      | 133/340 (39.1%)             |

doi:10.1371/journal.pone.0017292.t001

frames (ORFs) was performed by a translated BLAST search (BLASTx at <http://www.ncbi.nlm.nih.gov/blast/Blast.cgi>) and an ORF finder at the website (<http://www.ncbi.nlm.nih.gov/gorf/gorf.html>). Sequences used for the comparison were comprised the following: HBoV1-4 (DQ000495, NC\_007455, EU918736, GQ867667, FJ973561, FJ375129, FJ170278 and NC\_012042), GBoV1 (HM145750), CnMV (AB158475, FJ899734, AF495467 and FJ214110), BPV1 (DQ335247 and NC\_001540), canine parvovirus (D26079, NC\_001539 and EU310373), porcine parvovirus (EU790642), mice minute virus (J02275), mouse parvovirus 1 (NC\_001630), bovine parvovirus (NC\_006259), porcine parvovirus 4 (HM031135, GQ387500, GQ387499), human parvovirus B19 (FJ591158), simian parvovirus (U26342), human parvovirus 4 (AY622943), goose parvovirus (NC\_001701), Muscovy duck parvovirus (NC\_006147), PBo-likeV (FJ872544), PBoV1 and PBoV2 (HM053693 and HM053694), and 6V and 7V (HM053672 and HM053673). Multiple sequence alignment was performed using CLUSTAL W. Protein amino acid distances were calculated using the MegAlign program (DNASTAR, Inc). Phylogenetic trees were generated using the neighbor joining (NJ) method with bootstrap of 1,000 replicates with MEGA 4.1 (<http://www.megasoftware.net/mega41.html>).

#### Nucleotide sequence accession numbers

The near-full genomes of PBoV1-H18, PBoV2-A6 and the partial NS1 and VP1 sequences from the diagnostic nPCR have been deposited in GenBank under accession numbers HQ291308-HQ291309 and HQ291310-HQ291343.

## Results

#### Novel porcine bocavirus sequence

Seventeen porcine samples stool supernatants from 17 farms were analyzed using a generic viral particle-protected nucleic acid enrichment procedure followed by random amplification of extracted RNA and DNA (see materials and methods) [46,54–

56]. Amplified DNA was then subcloned and 1190 plasmid inserts were sequenced (70 for each of 17 samples). Nine samples (totaling 82 subclones) showed the presence of fragments whose virtual translation products were related to canine and human bocaviruses using BLASTx. Twenty-four clones from pig sample H18 and 26 clones from pig sample A6 showed significant similarity with bocaviruses. H18 derived sequences showed high (>99%) identity with the recently described porcine bocavirus-like virus (PBo-LikeV), the only porcine bocavirus reported at the time of these experiments (GenBank GU902971) [27]. Sequences from porcine sample A6 showed low identity with those of H18 and PBo-likeV. The H18 and A6 samples were selected for targeted viral genome amplification and sequencing.

#### Nearly complete genomes of PBoV1 and PBoV2

The 24 sequences from H18 were assembled to form a continuous sequence of approximately 2700 nucleotides that appeared to lack >1300 and 1000 nucleotides from the 5' and 3' ends of its genome. PCR primers based on the available H18 sequences and regions highly conserved between HBoV2 (FJ170278) and canine bocavirus (FJ214110) were used to amplify the nearly complete bocavirus genome we provisionally called PBoV1-H18 (5267 nt). To confirm this genome sequence, this sequence was re-amplified using 6 sets of PCR primers generating overlapping fragments of the genome which were directly sequenced. Using the same method, the nearly complete bocavirus genome (5117 nt) from sample A6 was also sequenced and was provisionally labeled PBoV2-A6.

Using an open reading frame (ORF) finder (<http://www.ncbi.nlm.nih.gov/gorf/gorf.html>), three ORF were found in both genomes (Figure 1). The ORFs of PBoV1-H18 were 636 aa for NS1, 219 aa for NP1 and 621 aa for VP1/VP2. The ORFs of PBoV2-A6 were 703 aa for NS1, 221 aa for NP1 and 704 aa for VP1/VP2. The possible splicing of bocavirus NS1 transcripts recently shown to extend the length of NS1 proteins was not investigated here [6,57].

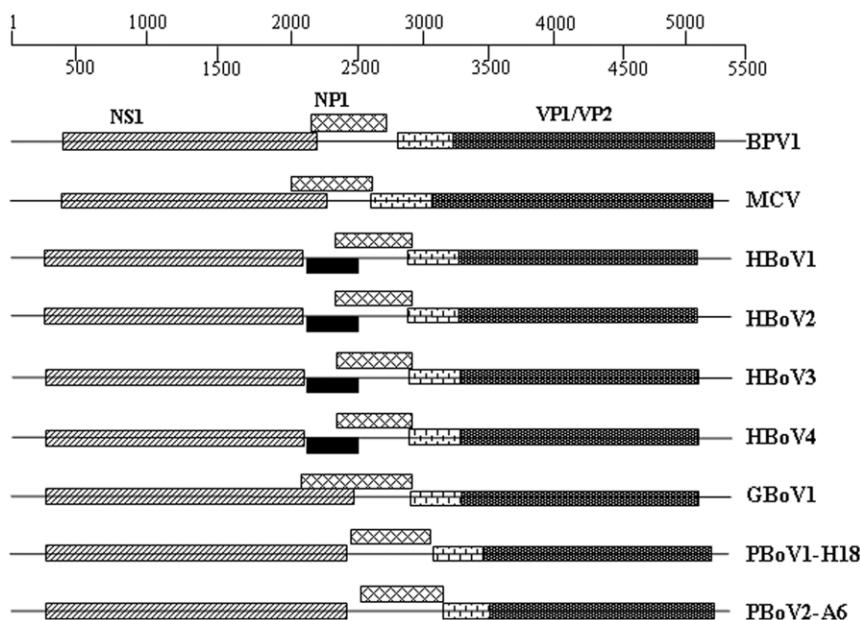

**Figure 1. The PBoV1 and PBoV2 genomes.** Diagrammatic representation of PBoV1-H18 and PBoV2-A6 sequences showing the position of ORFs for NS1, NP1, VP1 and VP2, compared with other bocaviruses. The black boxes represent the known spliced exon of NS1 transcripts. doi:10.1371/journal.pone.0017292.g001

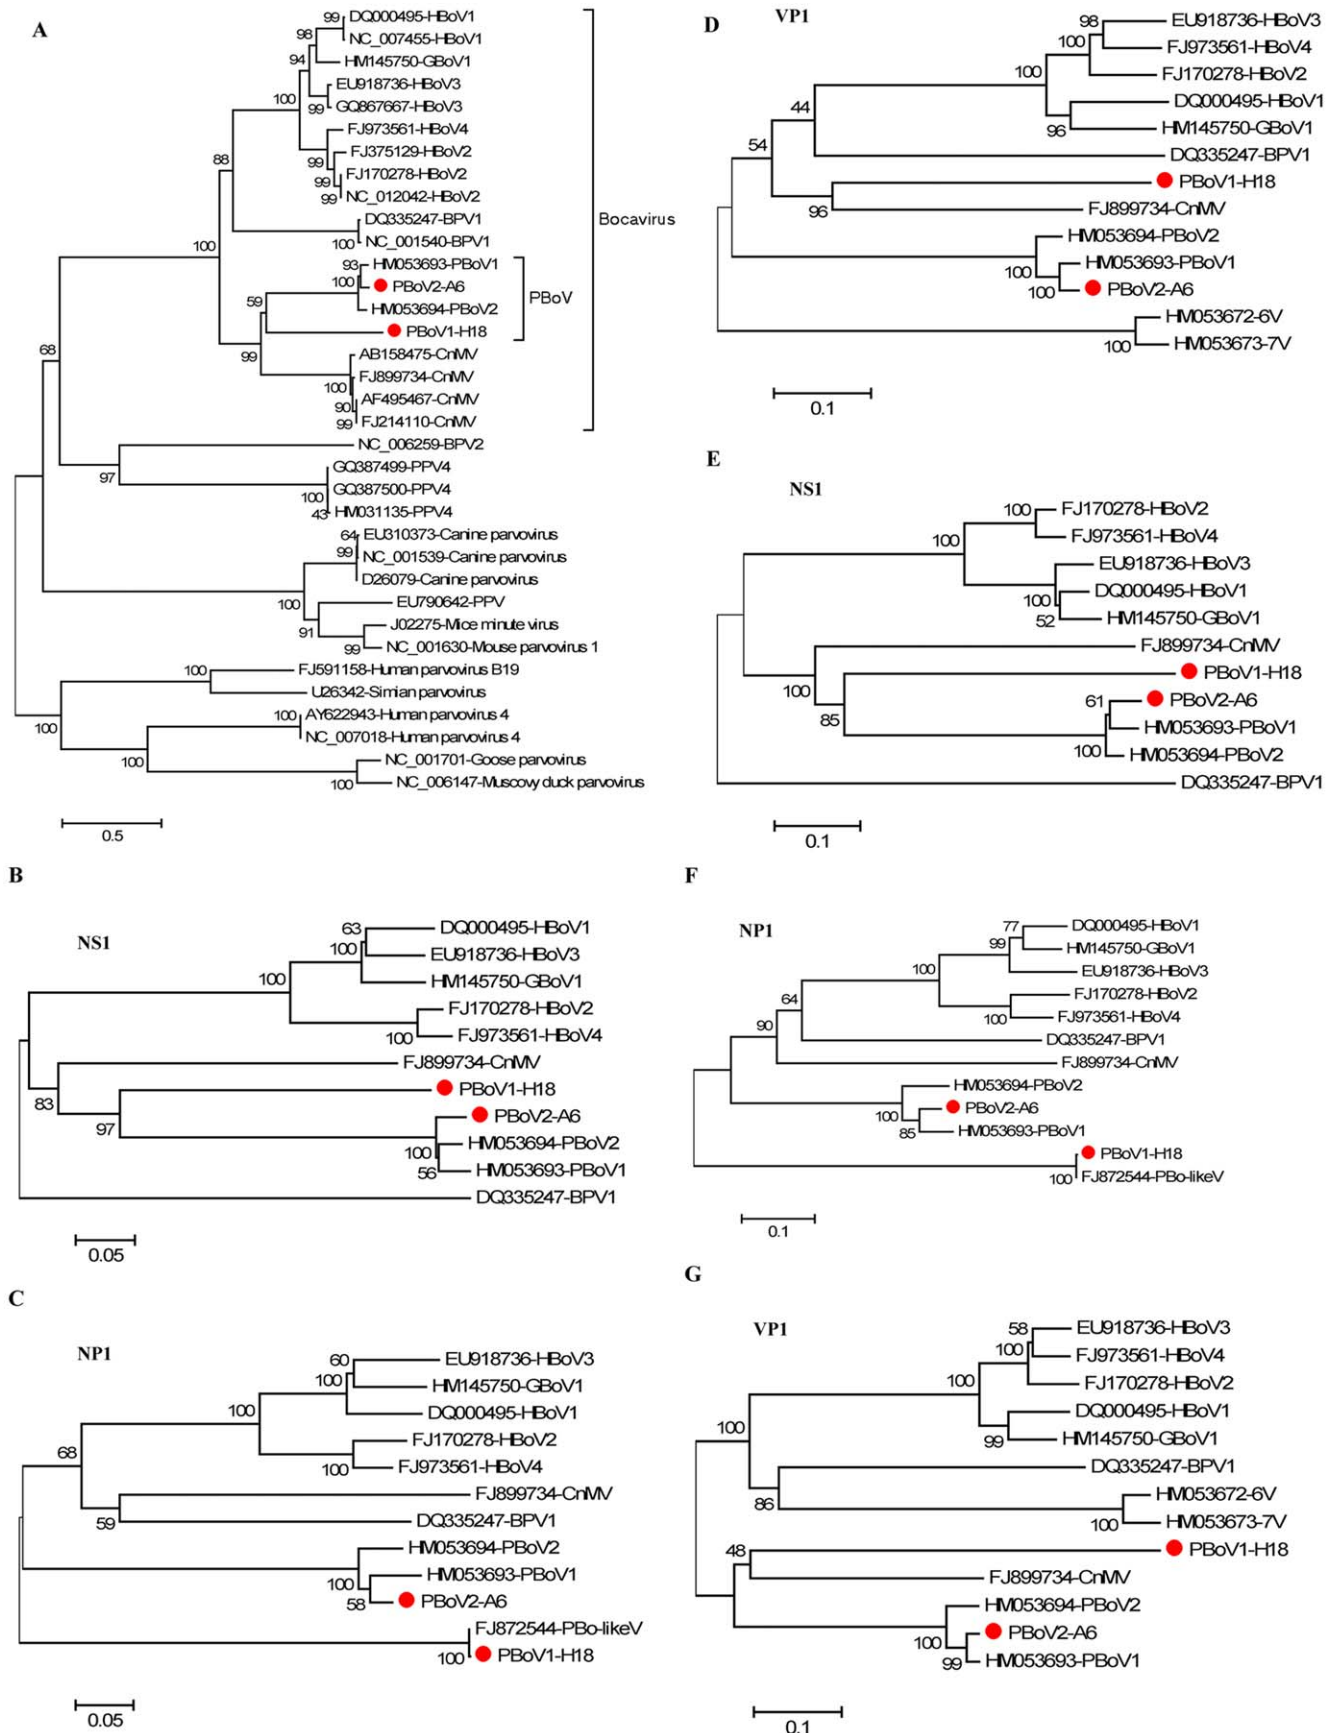

**Figure 2. Phylogenetic tree constructed by the neighbor-joining method with 1,000 bootstrap replicates using MEGA4.0 software.** Bootstrap values are indicated at each branching point. Scale bar indicates estimated genetic distance. Phylogenetic analysis of the nearly full-length genomes of PBoV1 and PBoV2 and 33 representative bocavirus species/strains (A). Phylogenetic analysis of nucleic acid and amino acid of NS1 (B and E), NP1 (C and F) and VP1 (D and G) ORFs of PBoV1-H18 and PBoV2-A6 and representative bocavirus species.  
doi:10.1371/journal.pone.0017292.g002

## Prevalence of PBoV1 and PBoV2

Nucleic acids were extracted from 340 porcine stool samples. PBoV1-H18 related sequences were screened for using nested PCR with primers amplifying a 530-bp fragment of the NP1/VP1 region. The electrophoretic bands of the expected size were subcloned and sequenced. The results showed that the prevalence of PBoV1-H18 related viruses was high in China with 215 out of 340 (63.2%) porcine samples positive (Table 1). All PBoV1-H18 related sequences showed >99% identity with each other. For PBoV2-A6 nested PCR, 219 out of 340 (64.4%) samples were positive (Table 1), with the amplicons showing 90% to 100% identity with each other. 133 out of 340 (39.1%) samples were co-infected with both PBoV1-H18 and PBoV2-A6 related viruses (Table 1).

## Phylogenetic analysis of PBoV1 and PBoV2

To determine the genetic relationship of PBoV1-H18 and PBoV2-A6 with recently described porcine bocaviruses and bocaviruses from other host species, both nucleotide and amino acid alignments were generated and used for phylogenetic analyses. When the whole genomes were considered porcine bocaviruses as a group (except for the V6/V7 variants with only NP1 sequences available), were most closely related to the canine bocavirus CnMV (Figure 2A). Phylogenetic analyses of the 3 ORFs – NS1, NP1 and VP1/VP2 – were also performed (Figure 2B–G). In all three regions, PBoV1-H18 was most closely related to the Chinese PBoV1 and PBoV2 recently reported by Cheng et al [28]. PBoV2-A6 was closely related in NP1 to the first reported partial porcine bocavirus sequence PBo-likeV from Sweden, the only region available for comparison (Fig. 2C, F) [27]. Table 2 numerically shows the protein similarities between PBoV1-H18 and PBoV2-A6 and other porcine and non-porcine bocaviruses.

The partial VP1 sequence of PBoV2-A6 related variants from different farms was also phylogenetically analyzed and fell into two major clades we named PBoV2 genotype 1 and 2 (PBoV2-G1 and PBoV2-G2). The two previously described Chinese PBoV1 and PBoV2 “species” grouped within these two genotypes.

## Discussion

PBo-likeV was originally found in swine with postweaning multisystemic wasting syndrome (PMWS) in 2009 when approximately 35% of its genome sequence was reported [27]. The nearly full genomes of two distantly related porcine bocaviruses labeled PBoV1 and PBoV2 as well as two partial genomes labeled V6 and V7 were then reported in 2010 [28]. These bocaviruses grouped into 3 phylogenetic clades containing PBo-likeV, PBoV1/PBoV2, and V6/V7. In the present study, we characterize two nearly complete bocavirus genomes, one of which (PBoV1-H18) grouped with the PBo-likeV clade while the second (PBoV2-A6) fell with the PBoV1/PBoV2 clade. We provisionally named the genome from the H18 sample PBoV1-H18 since its closest homologue, PBo-likeV, was the first reported porcine bocavirus [27]. The virus from sample A6 was provisionally named PBoV2-A6 since it phylogenetically groups with the second reported set of porcine bocaviruses containing both PBoV1 and PBoV2 [28]. No close homologues of the V6/V7 clade were identified in this study. Under this proposed classification scheme, the viruses labeled PBoV1 and PBoV2 by Cheng et al, therefore both belong to the PBoV2 clade, the second reported clade of porcine bocaviruses [28]. Under this proposed taxonomic classification, the V6 and V7 bocaviruses [28] belong to the still only partially characterized PBoV3 clade.

Sequence analysis of the PBoV2 clade showed that their VP1/VP2 genes were highly diverse and could be classified into two genotypes (Figure 3). The partial NP1 and VP1 genes of PBoV1-H18 related viruses detected in this study were more highly conserved (99–100% identity), consistent with a recent report by Zhai et al reporting PBoV1 in Chinese pigs using partial VP1/VP2 nested PCR and sequencing [58]. Zhai et al also found a high prevalence of PBoV1 (69% in weanling piglets) with a higher frequency of PBoV1 in animals also infected with PCV2, PRRSV, PTTV or CSFV and in pigs with respiratory symptoms versus healthy pigs [58].

Members of the bocavirus genus contain an 3<sup>rd</sup> ORF of unknown function labeled NP1 gene. Recently another parvovirus (PPV4) was identified in porcine feces that also contained a central

**Table 2.** Comparison of pairwise amino acid distances (p-distance) of three genes between PBoV1-H18, PBoV2-A6 and other bocaviruses.

|                  | PBoV1-H18 | PBoV2-A6 | PBo-likeV | PBoV1 | PBoV2 | 6V   | 7V   | HBoV1 | HBoV2 | HBoV3 | HBoV4 | GBoV1 | CnMV | BPV1 |
|------------------|-----------|----------|-----------|-------|-------|------|------|-------|-------|-------|-------|-------|------|------|
| <b>PBoV1-H18</b> |           |          |           |       |       |      |      |       |       |       |       |       |      |      |
| NS1              | -         | 51.8     | -         | 52.9  | 51.7  | -    | -    | 59.6  | 58.6  | 59.4  | 59.2  | 59.7  | 55.8 | 65.8 |
| NP1              | -         | 62.3     | 0         | 64.2  | 62.2  | -    | -    | 67.9  | 67.6  | 68.7  | 66.2  | 68.8  | 64.8 | 67.6 |
| VP1              | -         | 52.3     | -         | 52.0  | 52.7  | 63.1 | 63.4 | 61.8  | 62.8  | 62.4  | 62.7  | 62.3  | 53.6 | 63.2 |
| <b>PBoV2-A6</b>  |           |          |           |       |       |      |      |       |       |       |       |       |      |      |
| NS1              | 51.8      | -        | -         | 6.8   | 5.8   | -    | -    | 58.7  | 58.3  | 60.1  | 58.3  | 62.2  | 55.9 | 66.7 |
| NP1              | 62.3      | -        | 62.3      | 7.9   | 10.1  | -    | -    | 54.7  | 58.1  | 55.1  | 56.7  | 57.5  | 51.9 | 58.1 |
| VP1              | 52.3      | -        | -         | 2.7   | 7.1   | 59.2 | 59.5 | 52.1  | 53.1  | 53.7  | 52.7  | 53.5  | 46.9 | 55.0 |

doi:10.1371/journal.pone.0017292.t002



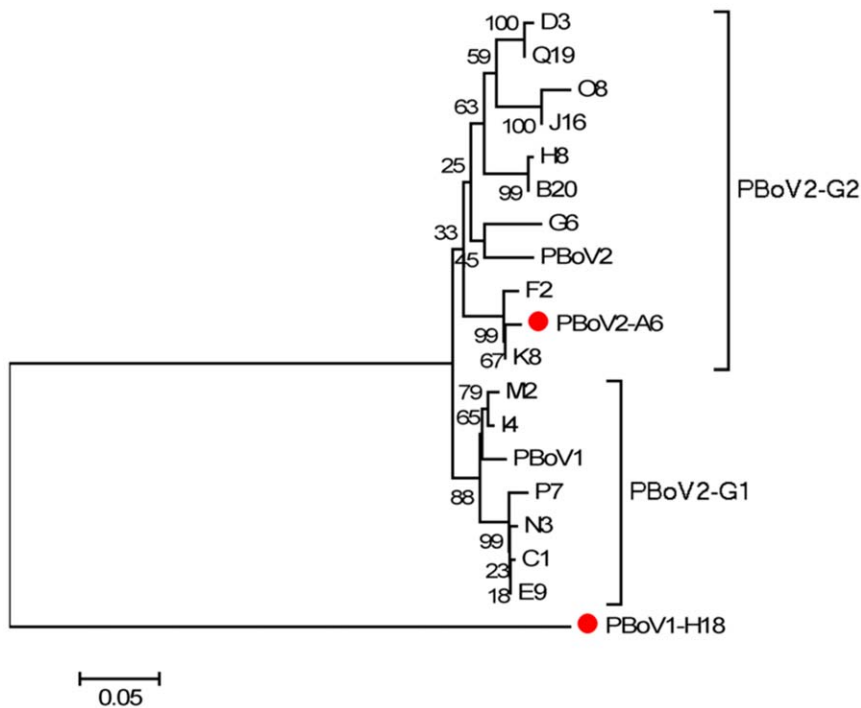

**Figure 3. Phylogenetic tree of PBoV2-A6 related isolates in China showing the presence of two genotypes using a 439-nt VP1 gene sequence alignment.** Bootstrap value was obtained from 1000 re-samplings of the data. The PBoV1-H18 strain is included as outgroup. Scale bar indicates estimated genetic distance. doi:10.1371/journal.pone.0017292.g003

3<sup>rd</sup> ORF, although unrelated in sequence to the bocaviruses NP1 [59]. None of the ORFs of PPV4 clustered phylogenetically with the bocaviruses (data not shown) but instead clustered with members of the parvovirus genus [59]. PPV4 is therefore unrelated to the bocaviruses reported here.

HBoV1 has been associated with respiratory symptoms while other HBoV may be associated with diarrhea and acute flaccid paralysis [5,8–10,11–22,25]. A gorilla bocavirus was detected in captive animals in the US experiencing severe diarrhea [6]. PBoV1 was found in pigs with PMWS in Sweden [27] and in pigs with respiratory tract symptoms in China [58]. In the present study, both PBoV1 and PBoV2 were highly prevalent in both

asymptomatic swine from five provinces of China. Further studies are needed to examine possible associations between infections with these different porcine bocaviruses, the viral loads excreted, the presence of co-infections and various porcine diseases.

### Author Contributions

Conceived and designed the experiments: TS DL CW XH ED. Performed the experiments: TS DL CW LC CZ WZ. Analyzed the data: TS DL CW LL CZ WZ ED. Contributed reagents/materials/analysis tools: TS DL CW LL LC CZ WZ XH ED. Wrote the paper: TS.

### References

- Claude M, Fauquet MAM, Maniloff J, Desselberger U, Ball LA, eds (2004) Virus Taxonomy: The Eighth Report of the International Committee on Taxonomy of Viruses. Academic Press.
- Manteuffel J, Truyen U (2008) Animal bocaviruses: a brief review. *Intervirology* 51: 328–334.
- Chen KC, Shull BC, Moses EA, Lederman M, Stout ER, et al. (1986) Complete nucleotide sequence and genome organization of bovine parvovirus. *J Virol* 60: 1085–1097.
- Binn LN, Lazar EC, Eddy GA, Kajima M (1970) Recovery and characterization of a minute virus of canines. *Infect Immun* 1: 503–8.
- Kapoor A, Simmonds P, Slikas E, Li L, Bodhidatta L, et al. (2010) Human bocaviruses are highly diverse, dispersed, recombination prone, and prevalent in enteric infections. *J Infect Dis* 201: 1633–1643.
- Kapoor A, Mehta N, Esper F, Poljsak-Prijatelj M, Quan PL, et al. (2010) Identification and characterization of a new bocavirus species in gorillas. *PLoS One* 5: e11948.
- Sharp CP, Lebreton M, Kantola K, Nana A, Difo JL, et al. (2010) Widespread infection of chimpanzees and gorillas with homologues of human parvovirus B19, PARV4 and human bocavirus in the wild. *J Virol* 84: 10289–10296.
- Allander T, Tammi MT, Eriksson M, Bjerkner A, Tiveljung-Lindell A, et al. (2005) Cloning of a human parvovirus by molecular screening of respiratory tract samples. *Proc Natl Acad Sci USA* 102: 12891–12896.
- Arthur JL, Higgins GD, Davidson GP, Givney RC, Ratcliff RM (2009) A novel bocavirus associated with acute gastroenteritis in Australian children. *PLoS Pathog* 5: e1000391.
- Kapoor A, Slikas E, Simmonds P, Chiochansin T, Naem A, et al. (2009) A newly identified bocavirus species in human stool. *J Infect Dis* 199: 196–200.
- Allander T (2008) Human bocavirus. *J Clin Virol* 41: 29–33.
- Allander T, Jartti T, Gupta S, Niesters HG, Lehtinen P, et al. (2007) Human bocavirus and acute wheezing in children. *Clin Infect Dis* 44: 904–910.
- Bastien N, Chui N, Robinson JL, Lee BE, Dust K, et al. (2007) Detection of human bocavirus in Canadian children in a 1-year study. *J Clin Microbiol* 45: 610–613.
- Catalano-Pons C, Buc M, Laude H, Cattani F, Moulin F, et al. (2007) Human bocavirus infection in hospitalized children during winter. *Pediatr Infect Dis J* 26: 959–960.
- Chung JY, Han TH, Kim CK, Kim SW (2006) Bocavirus infection in hospitalized children, South Korea. *Emerg Infect Dis* 12: 1254–1256.
- Fry AM, Lu X, Chittaganpitch M, Peret T, Fischer J, et al. (2007) Human bocavirus: a novel parvovirus epidemiologically associated with pneumonia requiring hospitalization in Thailand. *J Infect Dis* 195: 1038–1045.
- Gagliardi TB, Iwamoto MA, Paula FE, Proenca-Modena JL, Saranzo AM, et al. (2009) Human bocavirus respiratory infections in children. *Epidemiol Infect* 137: 1032–1036.

18. Lau SK, Yip CC, Que TL, Lee RA, Au-Yeung RK, et al. (2007) Clinical and molecular epidemiology of human bocavirus in respiratory and fecal samples from children in Hong Kong. *J Infect Dis* 196: 986–993.
19. Albuquerque MC, Rocha LN, Benati FJ, Soares CC, Maranhao AG, et al. (2007) Human bocavirus infection in children with gastroenteritis, Brazil. *Emerg Infect Dis* 13: 1756–1758.
20. Campe H, Hartberger C, Sing A (2008) Role of Human Bocavirus infections in outbreaks of gastroenteritis. *J Clin Virol* 43: 340–342.
21. Lindner J, Modrow S (2008) Human bocavirus—a novel parvovirus to infect humans. *Intervirology* 51: 116–122.
22. Ziegler S, Tillmann RL, Muller A, Simon A, Schildgen V, et al. (2008) No gastroenteric Bocavirus in high risk patients stool samples. *J Clin Virol* 43: 349–350.
23. Chieochansin T, Thongmee C, Vimolket L, Theamboonlers A, Poovorawan Y (2008) Human bocavirus infection in children with acute gastroenteritis and healthy controls. *Jpn J Infect Dis* 61: 479–481.
24. de Vries JJ, Bredius RG, van Rheezen PF, Smiers FJ, Scholvinck EH, et al. (2009) Human bocavirus in an immunocompromised child presenting with severe diarrhea. *J Clin Microbiol* 47: 1241–3.
25. Shan TL, Zhang W, Guo W, Cui L, Yuan CL, et al. (2009) The first detection of human bocavirus 2 infections in China. *J Clin Virol* 46: 196–197.
26. Blinkova O, Rosario K, Li L, Kapoor A, Slikas B, et al. (2009) Frequent detection of highly diverse variants of cardiovirus, cosavirus, bocavirus, and circovirus in sewage samples collected in the United States. *J Clin Microbiol* 47(11): 3507–13.
27. Blomström AL, Belák S, Fossum C, McKillen J, Allan G, et al. (2009) Detection of a novel porcine boca-like virus in the background of porcine circovirus type 2 induced postweaning multisystemic wasting syndrome. *Virus Res* 146: 125–129.
28. Cheng W, Li J, Huang C, Yao D, Liu N, et al. (2010) Identification and nearly full-length genome characterization of novel porcine bocaviruses. *PLoS One* 5(10): e13583.
29. Allander T, Andreasson K, Gupta S, Bjerkner A, Bogdanovic G, et al. (2007) Identification of a third human polyomavirus. *J Virol* 81: 4130–4136.
30. Allander T, Emerson SU, Engle RE, Purcell RH, Bukh J (2001) A virus discovery method incorporating DNase treatment and its application to the identification of two bovine parvovirus species. *Proc Natl Acad Sci USA* 98: 11609–11614.
31. Blinkova O, Kapoor A, Victoria J, Jones M, Wolfe N, et al. (2009) Cardioviruses are genetically diverse and cause common enteric infections in South Asian children. *J Virol* 83: 4631–4641.
32. Briese T, Paweska JT, McMullan LK, Hutchison SK, Street C, et al. (2009) Genetic detection and characterization of Lujo virus, a new hemorrhagic fever-associated arenavirus from Southern Africa. *PLoS Pathog* 4: e1000455.
33. Chiu CY, Greninger AL, Kanada K, Kwok T, Fischer KF, et al. (2008) Identification of cardioviruses related to Theiler's murine encephalomyelitis virus in human infections. *Proc Natl Acad Sci USA* 105: 14124–14129.
34. Cox-Foster DL, Conlan S, Holmes EC, Palacios G, Evans JD, et al. (2007) A metagenomic survey of microbes in honey bee colony collapse disorder. *Science* 318: 283–287.
35. Delwart EL (2007) Viral metagenomics. *Rev Med Virol* 17: 115–131.
36. Feng H, Shuda M, Chang Y, Moore PS (2008) Clonal integration of a polyomavirus in human Merkel cell carcinoma. *Science* 319: 1096–1100.
37. Finkbeiner SR, Kirkwood CD, Wang D (2008) Complete genome sequence of a highly divergent astrovirus isolated from a child with acute diarrhea. *Virol J* 5: 117.
38. Gaynor AM, Nissen MD, Whitley DM, Mackay IM, Lambert SB, et al. (2007) Identification of a novel polyomavirus from patients with acute respiratory tract infections. *PLoS Pathog* 3: e64.
39. Greninger AL, Runckel C, Chiu CY, Haggerty T, Parsonnet J, et al. (2009) The complete genome of klassevirus—a novel picornavirus in pediatric stool. *Virol J* 6: 82.
40. Holtz LR, Finkbeiner SR, Zhao G, Kirkwood CD, Girones R, et al. (2009) Klassevirus 1, a previously undescribed member of the family Picornaviridae, is globally widespread. *Virol J* 6: 86.
41. Honkavuori KS, Shivaprasad HL, Williams BL, Quan PL, Hornig M, et al. (2008) Novel borna virus in psittacine birds with proventricular dilatation disease. *Emerg Infect Dis* 14: 1883–1886.
42. Jones MS, Harrach IIB, Ganac RD, Gozum MM, Dela Cruz WP, et al. (2007) New adenovirus species found in a patient presenting with gastroenteritis. *J Virol* 81: 5978–5984.
43. Jones MS, Kapoor A, Lukashov VV, Simmonds P, Hecht F, et al. (2005) New DNA viruses identified in patients with acute viral infection syndrome. *J Virol* 79: 8230–8236.
44. Jones MS, Lukashov VV, Ganac RD, Schnurr DP (2007) Discovery of a novel human picornavirus in a stool sample from a pediatric patient presenting with fever of unknown origin. *J Clin Microbiol* 45: 2144–2150.
45. Kapoor A, Victoria J, Simmonds P, Wang C, Shafer RW, et al. (2008) A highly divergent picornavirus in a marine mammal. *J Virol* 82: 311–320.
46. Kapoor A, Victoria J, Simmonds P, Slikas E, Chieochansin T, et al. (2008) A highly prevalent and genetically diversified Picornaviridae genus in South Asian children. *Proc Natl Acad Sci USA* 105: 20482–20487.
47. Kistler AL, Gancz A, Clubb S, Skewes-Cox P, Fischer K, et al. (2008) Recovery of divergent avian bornaviruses from cases of proventricular dilatation disease: identification of a candidate etiologic agent. *Virol J* 5: 88.
48. Li L, Victoria J, Kapoor A, Naem A, Shaikat S, et al. (2009) Genomic characterization of novel human parechovirus type. *Emerg Infect Dis* 15: 288–291.
49. Lipkin WI (2008) Pathogen discovery. *PLoS Pathog* 4: e1000002.
50. Palacios G, Druce J, Du L, Tran T, Birch C, et al. (2008) A new arenavirus in a cluster of fatal transplant-associated diseases. *N Engl J Med* 358: 991–998.
51. Rota PA, Oberste MS, Monroe SS, Nix WA, Campagnoli R, et al. (2003) Characterization of a novel coronavirus associated with severe acute respiratory syndrome. *Science* 300: 1394–1399.
52. Urisman A, Molinaro RJ, Fischer N, Plummer SJ, Casey G, et al. (2006) Identification of a novel gammaretrovirus in prostate tumors of patients homozygous for R462Q RNASEL variant. *PLoS Pathog* 2: e25.
53. van den Hoogen BG, de Jong JC, Groen J, Kuiken T, de Groot R, et al. (2001) A newly discovered human pneumovirus isolated from young children with respiratory tract disease. *Nat Med* 7: 719–724.
54. Victoria JG, Kapoor A, Dupuis K, Schnurr DP, Delwart EL (2008) Rapid identification of known and new RNA viruses from animal tissues. *PLoS Pathog* 4(9): e1000163.
55. Victoria JG, Kapoor A, Li L, Blinkova O, Slikas B, et al. (2009) Metagenomic analyses of viruses in stool samples from children with acute flaccid paralysis. *J Virol* 83(9): 4642–51.
56. Stang A, Korn K, Wildner O, Oberla K (2005) Characterization of virus isolates by particle-associated nucleic acid PCR. *J Clin Microbiol* 43: 716–720.
57. Chen AY, Cheng F, Lou S, Luo Y, Liu Z, et al. (2010) Characterization of the gene expression profile of human bocavirus. *Virology* 403(2): 145–54.
58. Zhai S, Yue C, Wei Z, Long J, Ran D, et al. (2010) High prevalence of a novel porcine bocavirus in weanling piglets with respiratory tract symptoms in China. *Arch Virol* 155: 1313–7.
59. Cheung AK, Wu G, Wang D, Bayles DO, Lager KM, et al. (2010) Identification and molecular cloning of a novel porcine parvovirus. *Arch Virol* 155(5): 801–6.
